# Supplementary material for: NIR-II femtosecond laser ignites MXene as photoacoustic bomb for continuous high-precision tumor blasting
Source: Royal Society of Chemistry journal article supplement (doi:10.1039/d3nr03665k), 2023-01-01
Supplement: d3nr03665k1.pdf [file d3nr03665k1.pdf]

## Supplementary Material

# NIR-II femtosecond laser ignites MXene as photoacoustic bombs for continuous high-precision tumor blasting

Jie Mi<sup>a,b</sup>, Dandan Cui<sup>a,b</sup>, Zhenhui Zhang<sup>a,b</sup>, Gen Mu<sup>a,b</sup>, Yujiao Shi<sup>\*a,b</sup>

<sup>a</sup>MOE Key Laboratory of Laser Life Science & Institute of Laser Life Science, College of Biophotonics, South China Normal University, Guangzhou 510631, China

<sup>b</sup> Guangdong Provincial Key Laboratory of Laser Life Science, College of Biophotonics, South China Normal University, Guangzhou 510631, China

✉ **Corresponding author:** Yujiao Shi, shiyuj@sncu.edu.cn

**Other co-authors' Emails:** Jie Mi, Email: mijie423125@163.com; Dan dan Cui, Email: qzasdeszplm@163.com; Zhenhui Zhang, Email: zhangbeioo@126.com; Gen Mu, Email: morgan\_phy@163.com.

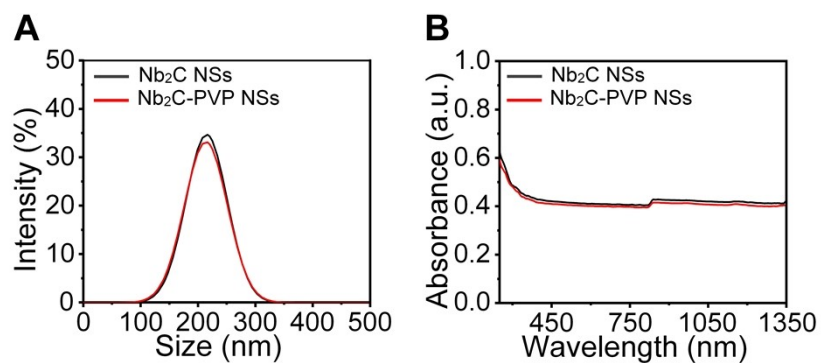

**Figure S1.** **A)** Particle size of Nb<sub>2</sub>C NSs and Nb<sub>2</sub>C-PVP NSs dispersed in water. **B)** UV-vis-NIR spectra of Nb<sub>2</sub>C NSs and Nb<sub>2</sub>C-PVP NSs dispersed in water.

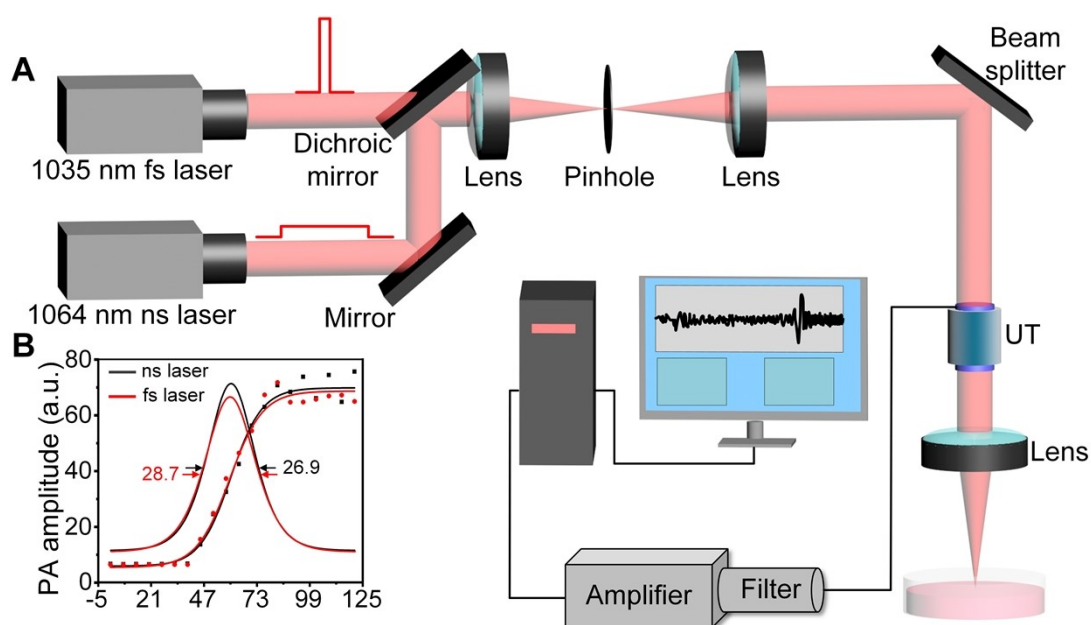

**Figure S2.** Schematic diagram of the experimental system. **A)** A 500 fs pulsed laser is used as the excitation source of ultrafast PA cavitation, and a 10 ns pulsed laser is used as comparison study. UT: Ultrasonic transducer. **B)** The lateral resolution of the system.

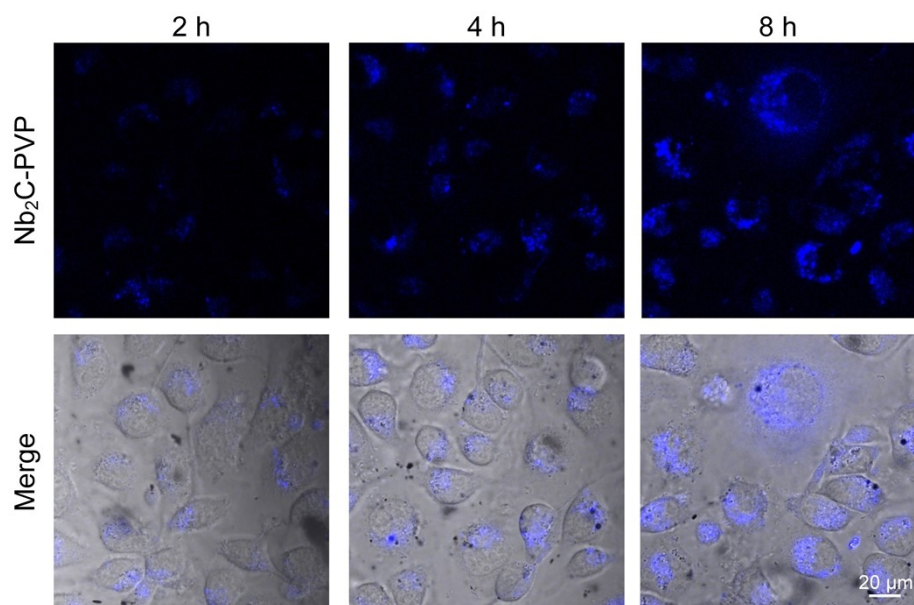

**Figure S3.** CLSM imaging of EMT6 cells upon incubation with Nb<sub>2</sub>C-PVP NSs for different durations (2h, 4h and 8h).

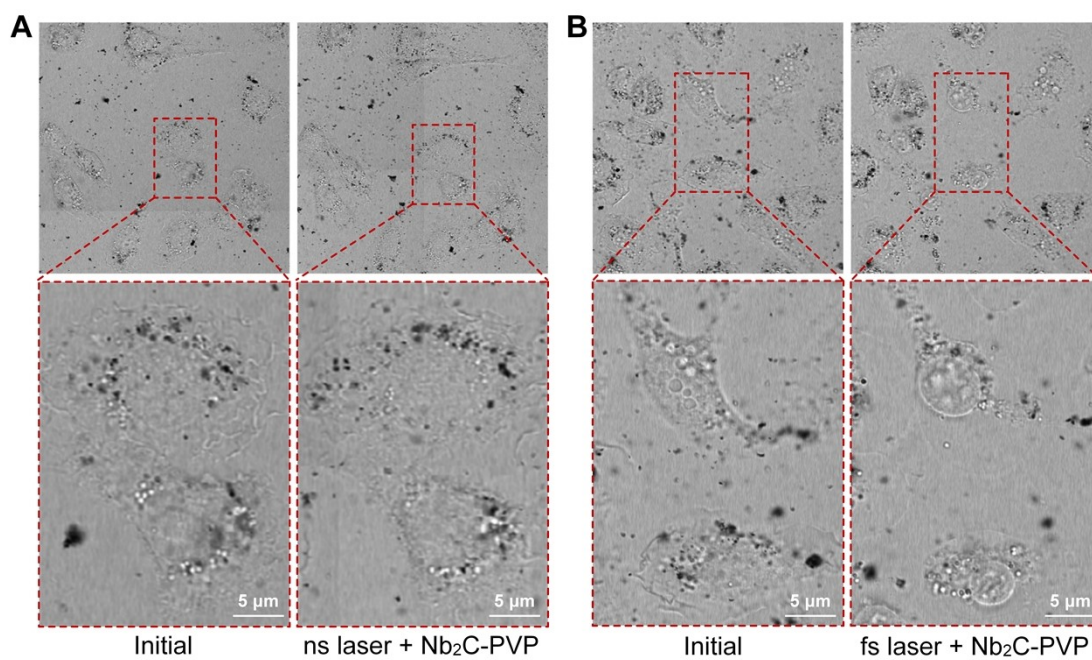

**Figure S4.** Confocal brightfield images of EMT6 cells co-incubated with Nb<sub>2</sub>C-PVP NSs before and after **A)** ns laser or **B)** fs laser irradiation under the same energy density, respectively.

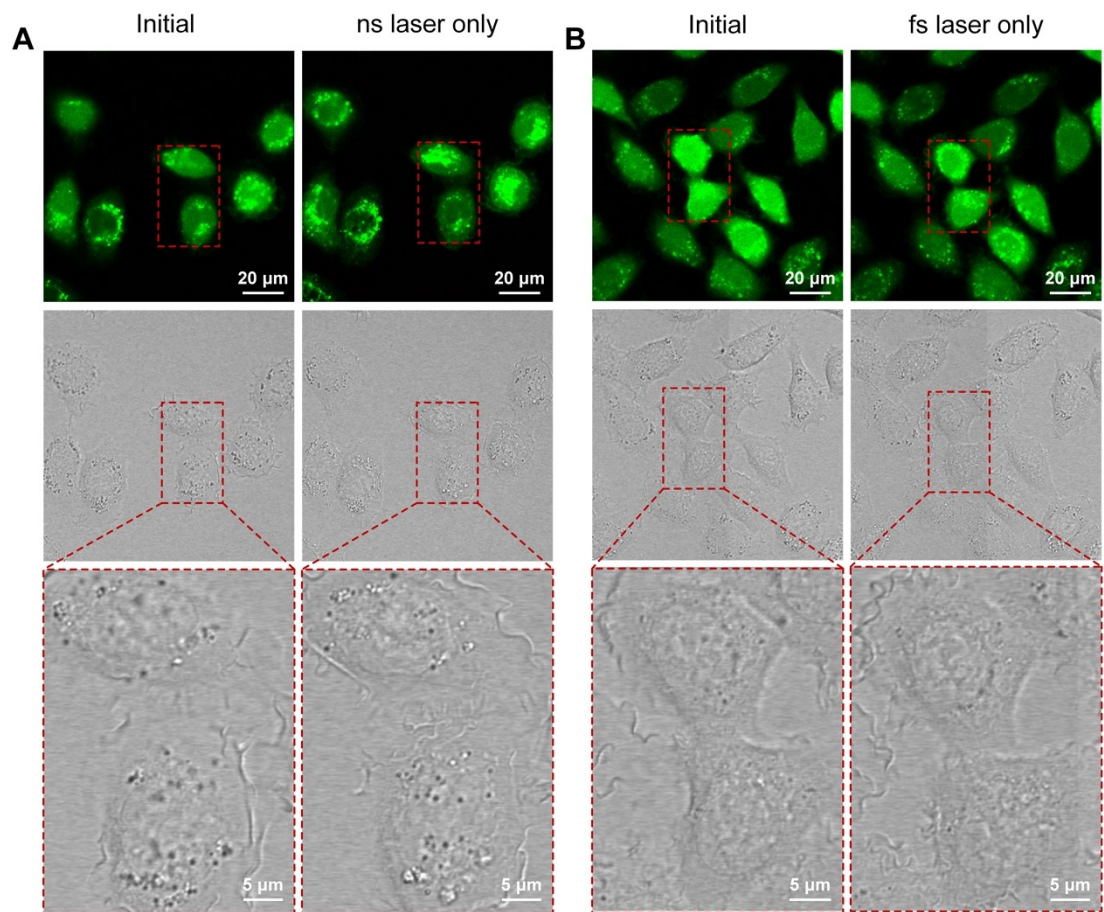

**Figure S5.** Morphological changes of EMT6 cells co-incubated without Nb<sub>2</sub>C-PVP NSs before and after **A)** ns laser or **B)** fs laser irradiation under the same energy density, respectively.

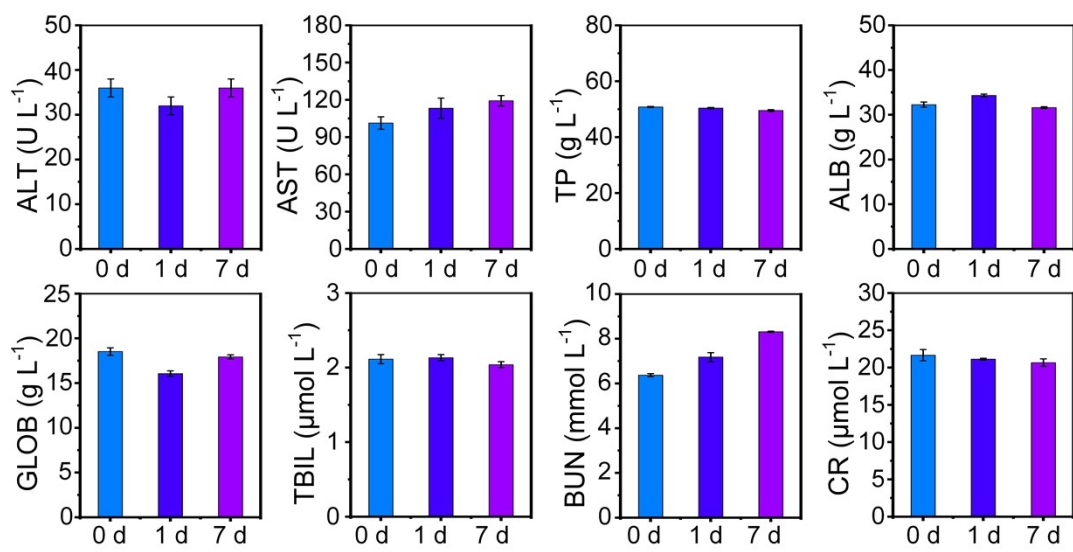

**Figure S6.** Blood biochemical analyses of healthy nude mice after intravenous injection with PBS and Nb<sub>2</sub>C-PVP NSs for 1 and 7 days, respectively. The terms are following: alanine transaminase (ALT), aspartate transaminase (AST), total protein (TP), albumin (ALB), globulin (GLOB), total bilirubin (TBIL), blood urea nitrogen (BUN), creatinine (CR).

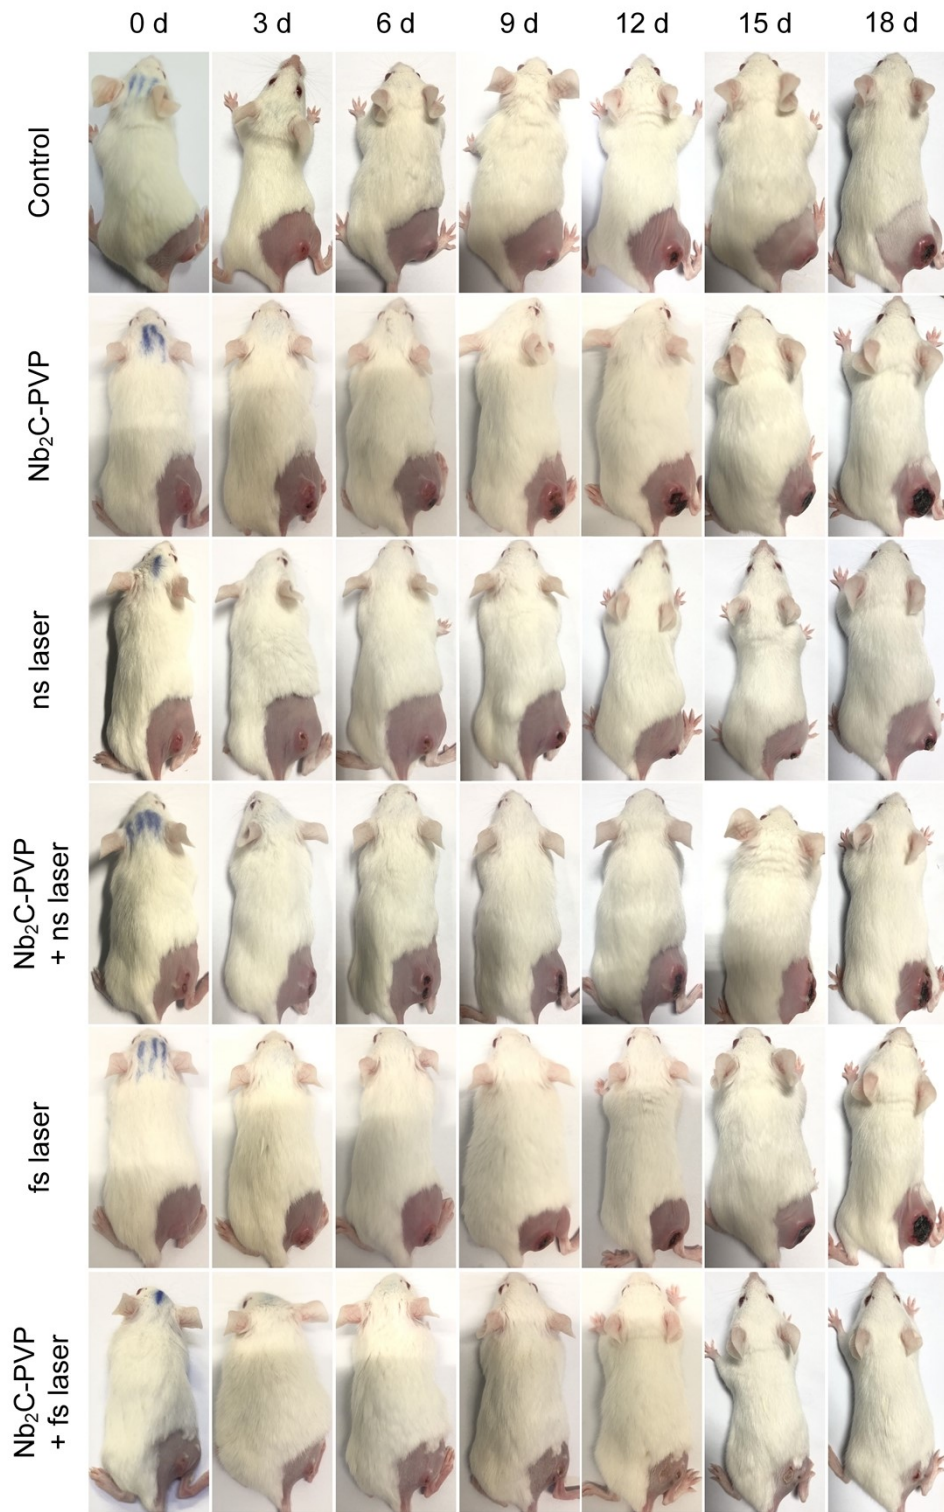

**Figure S7.** Photographs of EMT6 tumor-bearing mice after the control and different treatments in 18 days' period.

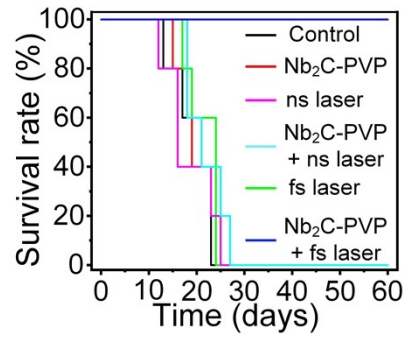

**Figure S8.** Survival rates of the EMT6 tumor-bearing mice within the feeding period.

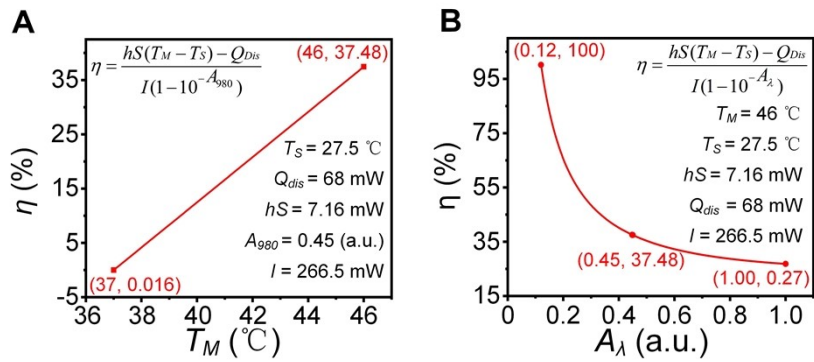

**Figure S9.** The curve of photothermal conversion efficiency ( $\eta$ ) change with **A)**  $T_M$  or **B)**  $A_\lambda$ .

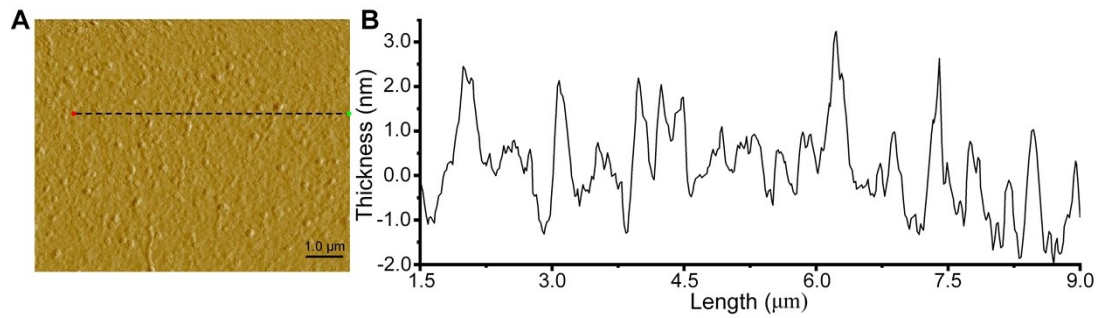

**Figure S10.** **A)** AFM image of  $\text{Nb}_2\text{C}$  NSs. **B)** Thickness distribution analysis of  $\text{Nb}_2\text{C}$  NSs.

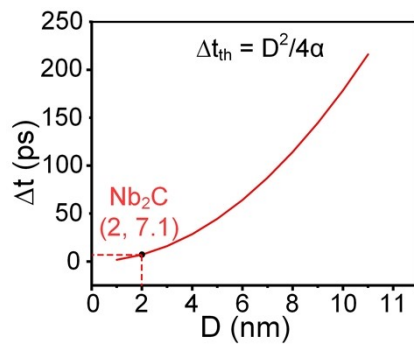

**Figure S11.** The simulated line of thermal confinement time changing with laser pulse width.

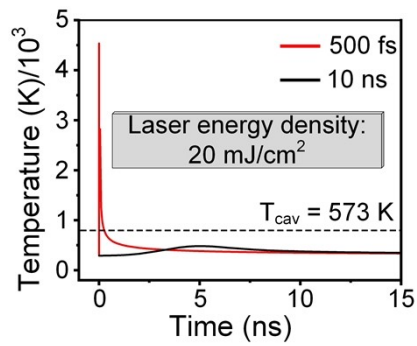

**Figure S12.** FEA Simulation line of lattice temperature rise of  $Nb_2C$  under the irradiation of femtosecond laser and nanosecond laser with the same single pulse energy density.



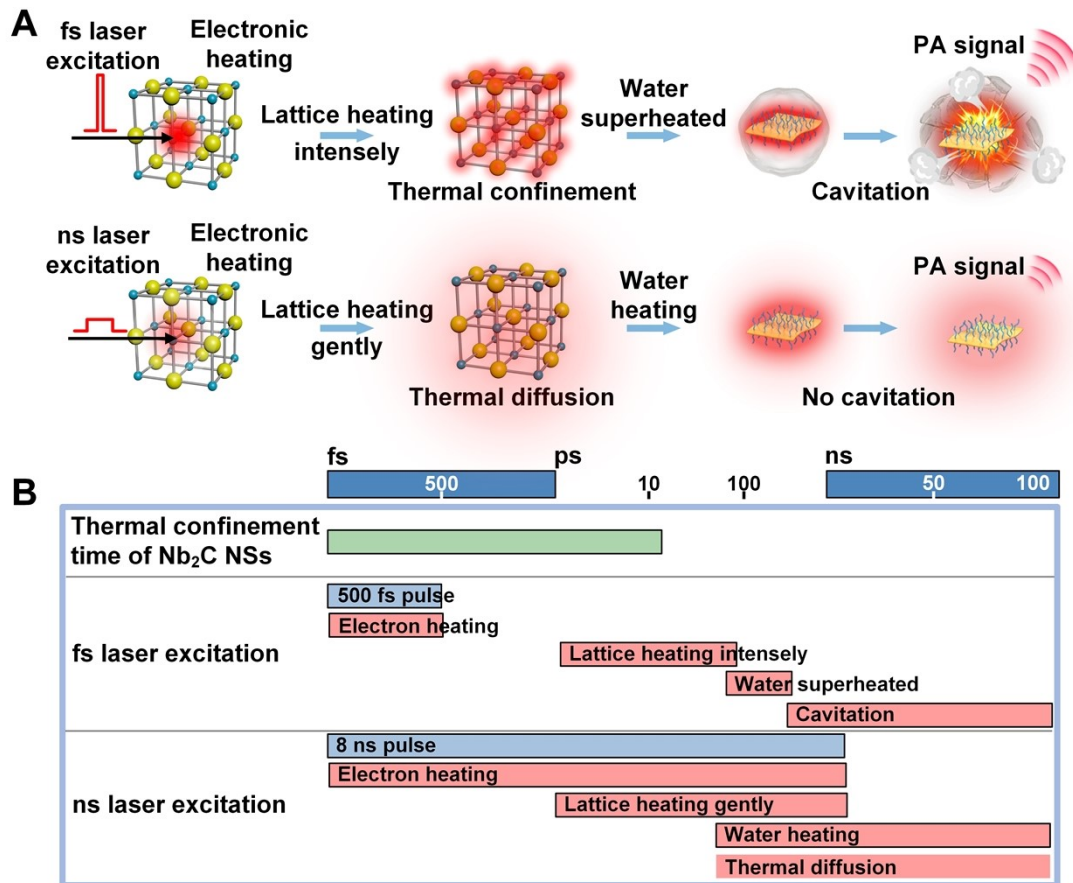

**Figure S13.** A) Schematic illustration of different physical mechanisms generated by fs and ns lasers irradiation with the same single pulse energy density. B) The related physical process and their timescales of fs and ns lasers.

**Table S1 Parameters used for air water and Nb<sub>2</sub>C.**

| Symbol                      | Parameter                | Values                                  | Symbol                       | Parameter            | Values                                  |
|-----------------------------|--------------------------|-----------------------------------------|------------------------------|----------------------|-----------------------------------------|
| $\mu_0$ (Air)               | relative permeability    | 1                                       | $\rho$ (H <sub>2</sub> O)    | density              | $1 \times 10^3$ kg/m <sup>3</sup>       |
| $\epsilon_0$ (Air)          | the permittivity         | 1                                       | $\sigma$ (H <sub>2</sub> O)  | conductivity         | 5.5 $\mu$ S/m                           |
| $\alpha$ (H <sub>2</sub> O) | thermal diffusivity      | $1.4 \times 10^{-3}$ cm <sup>2</sup> /s | $k$ (Nb <sub>2</sub> C)      | thermal conductivity | 14 W/(mⓀk)                              |
| $\Delta t_{th}$             | thermal confinement time | 0.40 ns                                 | $\alpha$ (Nb <sub>2</sub> C) | thermal expansivity  | $6.65 \times 10^{-6}$ 1/k               |
| $k$ (H <sub>2</sub> O)      | thermal conductivity     | 0.58<br>W/(mⓀk)                         | $C_p$ (Nb <sub>2</sub> C)    | heat capacity        | 185.8<br>J/(kgⓀk)                       |
| $\alpha$ (H <sub>2</sub> O) | thermal expansivity      | $70 \times 10^{-6}$ 1/k                 | $\rho$ (Nb <sub>2</sub> C)   | density              | $7.85 \times 10^3$<br>kg/m <sup>3</sup> |
| $C_p$ (H <sub>2</sub> O)    | heat capacity            | $4.2 \times 10^3$<br>J/(kgⓀk)           |                              |                      |                                         |
